# Supplementary material for: Untargeted Metabolomics and Transcriptomics Reveal the Mechanism of Metabolite Differences in Spring Tender Shoots of Tea Plants of Different Ages
Source: MDPI journal article supplement (doi:10.3390/foods11152303), 2022-08-02
Supplement: s1 [file s1]

**Table S1 The primers used in this study**

| Gene ID            | Forward primer (5'-3') | Reverse primer       |
|--------------------|------------------------|----------------------|
| CSS0041448(PAL)    | TGCAATCTGAGGTTCTCCCG   | CCGACCGACCCCAGAAATAG |
| CSS0007481(FLS)    | CTTACGAGGGGTACGGAAGC   | CATCGGCCACTTCTTCTGGT |
| CSS0030176(F3'H)   | TCTCTCTCCCTCGAATGGCA   | CTAAGCTCATCCCGGCACAT |
| CSS0014132(F3'5'H) | ATGCATGTGAGGTGAACGGT   | TCCGGCACACATTCTTCTCC |
| CSS0010687(ANS)    | ATTCCGGCAACAAGCGAGTA   | GAGCTCTGGTTGAGGGCATT |
| CSS0000672(DFR)    | ATTGTTCGTGCAACCGTTTCG  | GGCCTCATCAAAGCTCCCTT |
| CSS0047425(FG3)    | TTTTTGCCGCCCTAAAACCG   | TCCAACCTCCAAGTCTCCGC |
| CSS0010486(PDT)    | ACAAAACGCACAGAATGCCC   | CTTTGGCACTGGAAAACCCG |
| CSS0007310(GLU)    | ACAAAACGCACAGAATGCCC   | CTTTGGCACTGGAAAACCCG |
| CSS0008013(ACED)   | AGAGTGGCTGGAATTTGCGA   | GGATTCCCTCGGCTGGAAAA |

**Table S4 transcriptome quality**

| Samples | Clean reads | Clean bases   | %≥Q30  | Mapped Reads        |
|---------|-------------|---------------|--------|---------------------|
| WL-7a   | 21,375,660  | 6,412,698,000 | 93.57% | 35,879,790 (83.93%) |
| WL-7b   | 23,821,013  | 7,146,303,900 | 93.51% | 39,877,323 (83.70%) |
| WL-7c   | 22,251,929  | 6,675,578,700 | 93.46% | 37,197,856 (83.58%) |
| WL-50a  | 21,145,793  | 6,343,737,900 | 93.58% | 35,658,203 (84.32%) |
| WL-50b  | 21,308,708  | 6,392,612,400 | 93.51% | 35,966,090 (84.39%) |
| WL-50c  | 21,249,726  | 6,374,917,800 | 93.48% | 35,672,234 (83.94%) |
| GC-7a   | 21,948,162  | 6,584,448,600 | 93.42% | 36,396,645 (82.92%) |
| GC-7b   | 21,392,207  | 6,417,662,100 | 93.31% | 35,988,819 (84.12%) |
| GC-7c   | 20,320,525  | 6,096,157,500 | 93.60% | 33,693,547 (82.91%) |
| GC-50a  | 21,024,858  | 6,307,457,400 | 93.49% | 35,673,125 (84.84%) |
| GC-50b  | 21,286,406  | 6,385,921,800 | 93.59% | 36,054,987 (84.69%) |
| GC-50c  | 21,849,876  | 6,554,962,800 | 93.08% | 36,814,023 (84.24%) |

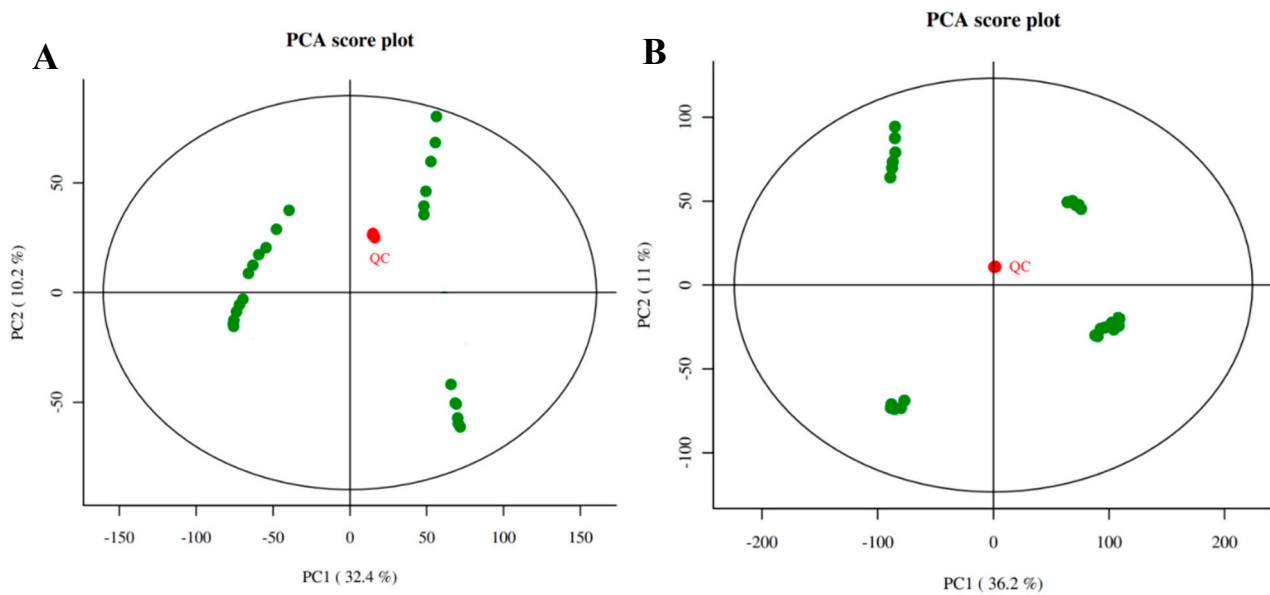

**Figure S1 Principal component analysis in positive (A) and negative (B) modes**

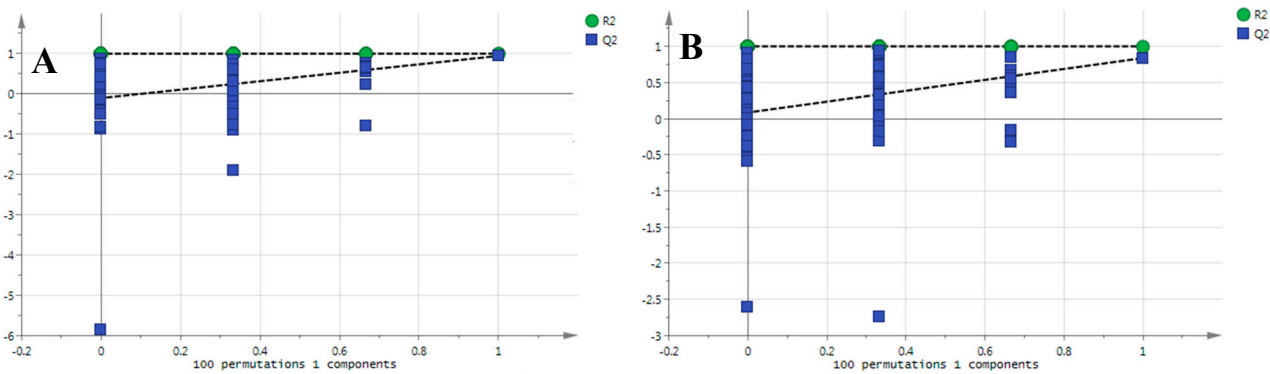

**Figure S2 Cross validation of OPLS-DA for Wulv1 (A) and Gancha 4 (B)**

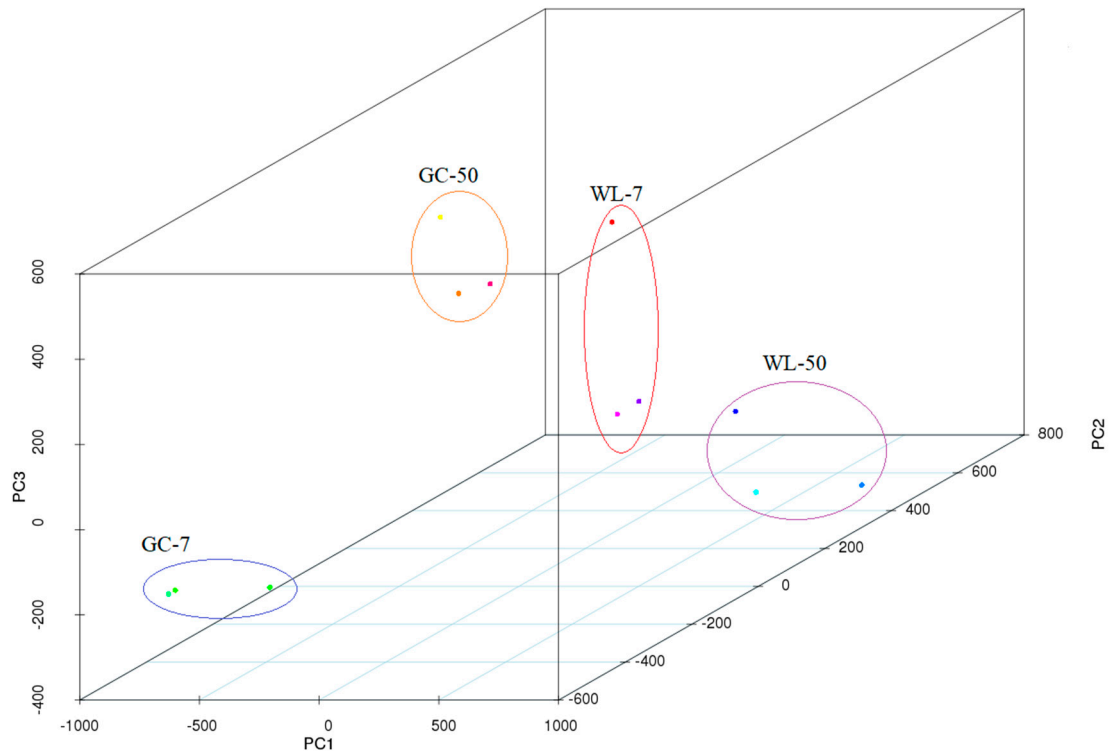

**Figure S3 PCA analysis of transcriptomics**

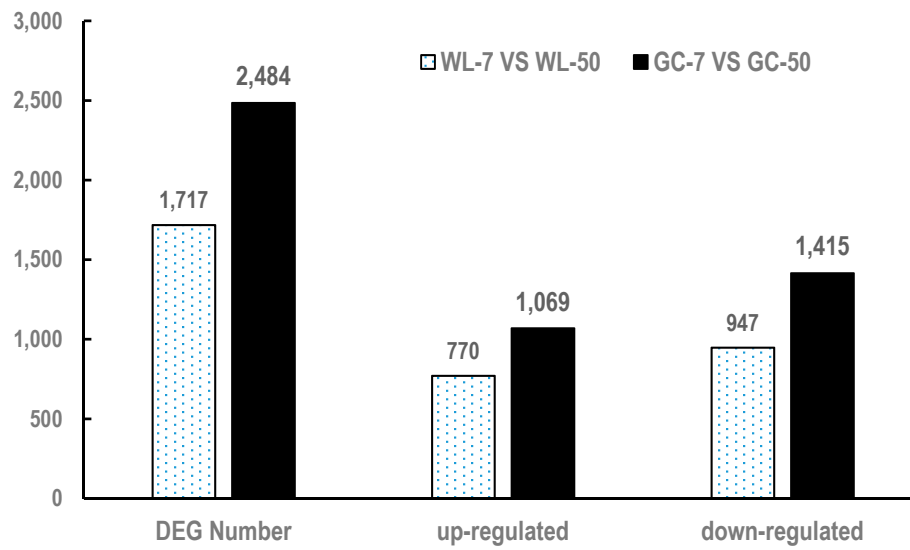

**Figure S4. Differentially expressed genes of two cultivars with different plant ages**

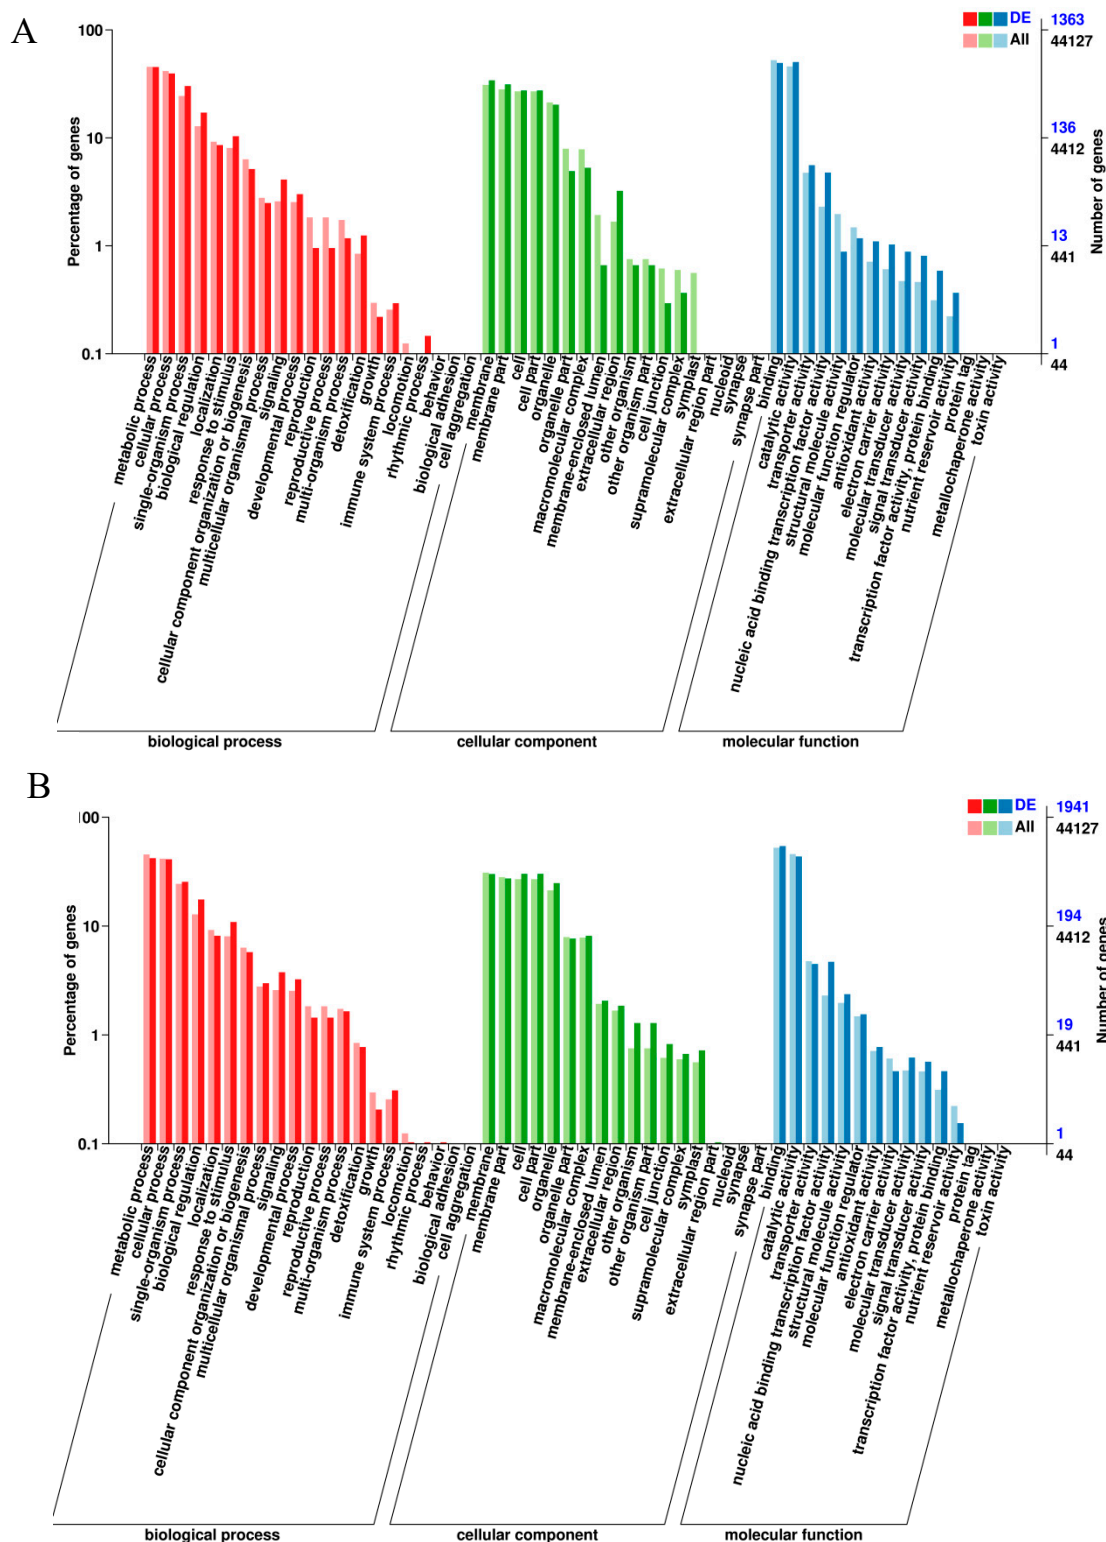

**Figure S5 GO enrichment analysis of differentially expressed genes in Wulv1 (A) and Gancha4 (B) of different plant ages**

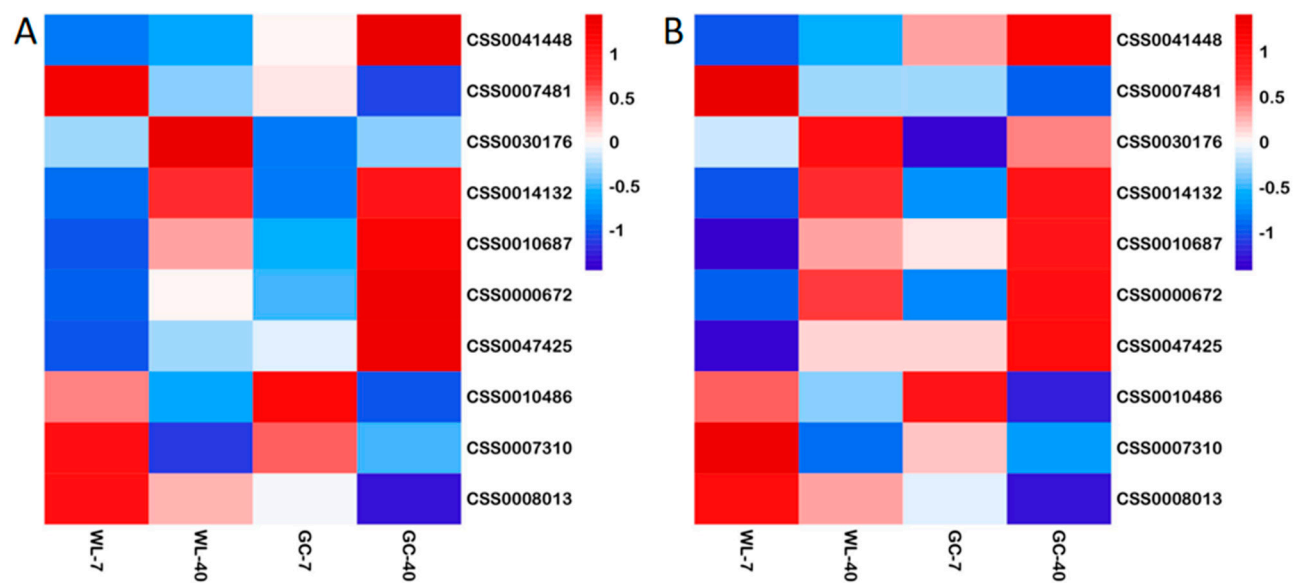

**Figure S6 qPCR validation of transcriptome data. (A) Transcriptome gene expression. (B) qPCR gene expression.**
